# Supplementary figures and images for: Understanding of Catalytic ROS Generation From Defect-Rich Graphene Quantum-Dots for Therapeutic Effects in Tumor Microenvironment
Source: Research Square preprint supplement (doi:10.21203/rs.3.rs-657051/v1), 2021-07-08

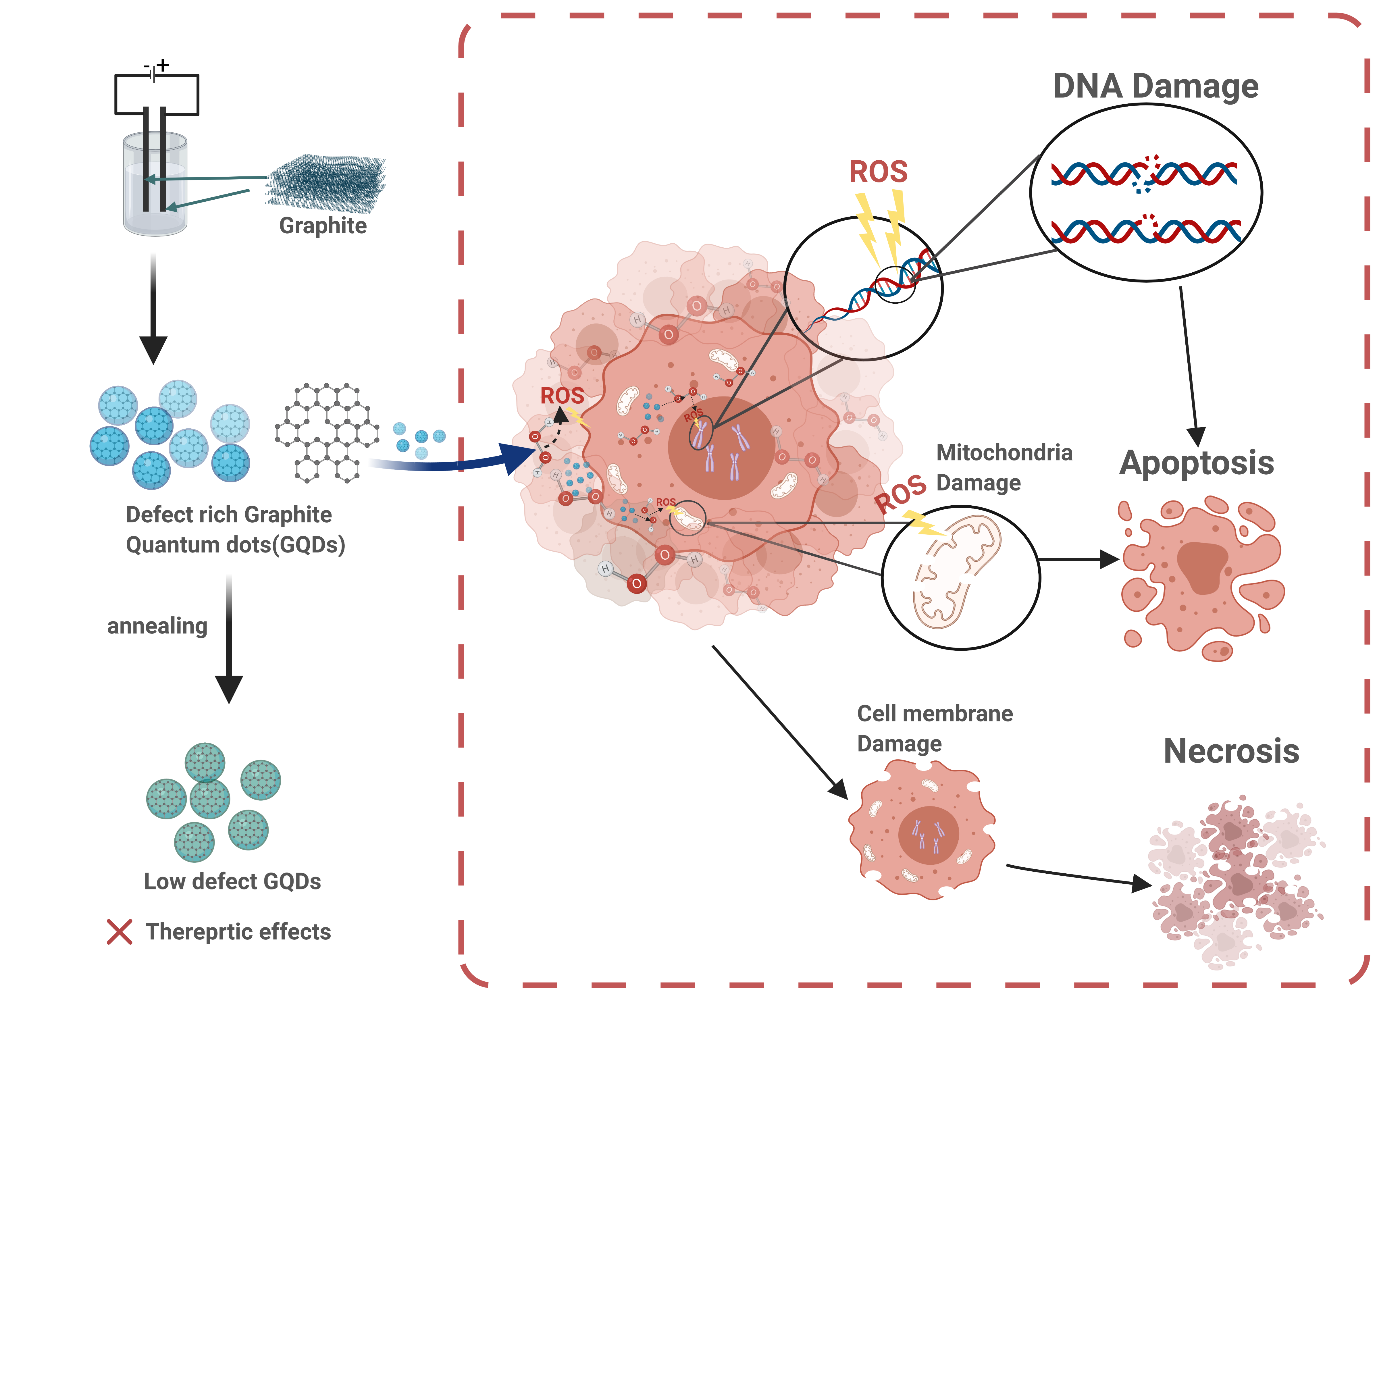

Supplement: Supplementary file 1 [file 5477266b294f140eded50e2e.docx]
